# Supplementary material for: Soy-castor oil based polyols prepared using a solvent-free and catalyst-free method and polyurethanes therefrom
Source: Royal Society of Chemistry journal article supplement (doi:10.1039/c3gc40531a), 2013-01-01
Supplement: c3gc40531a.pdf [file c3gc40531a.pdf]

## Supporting information

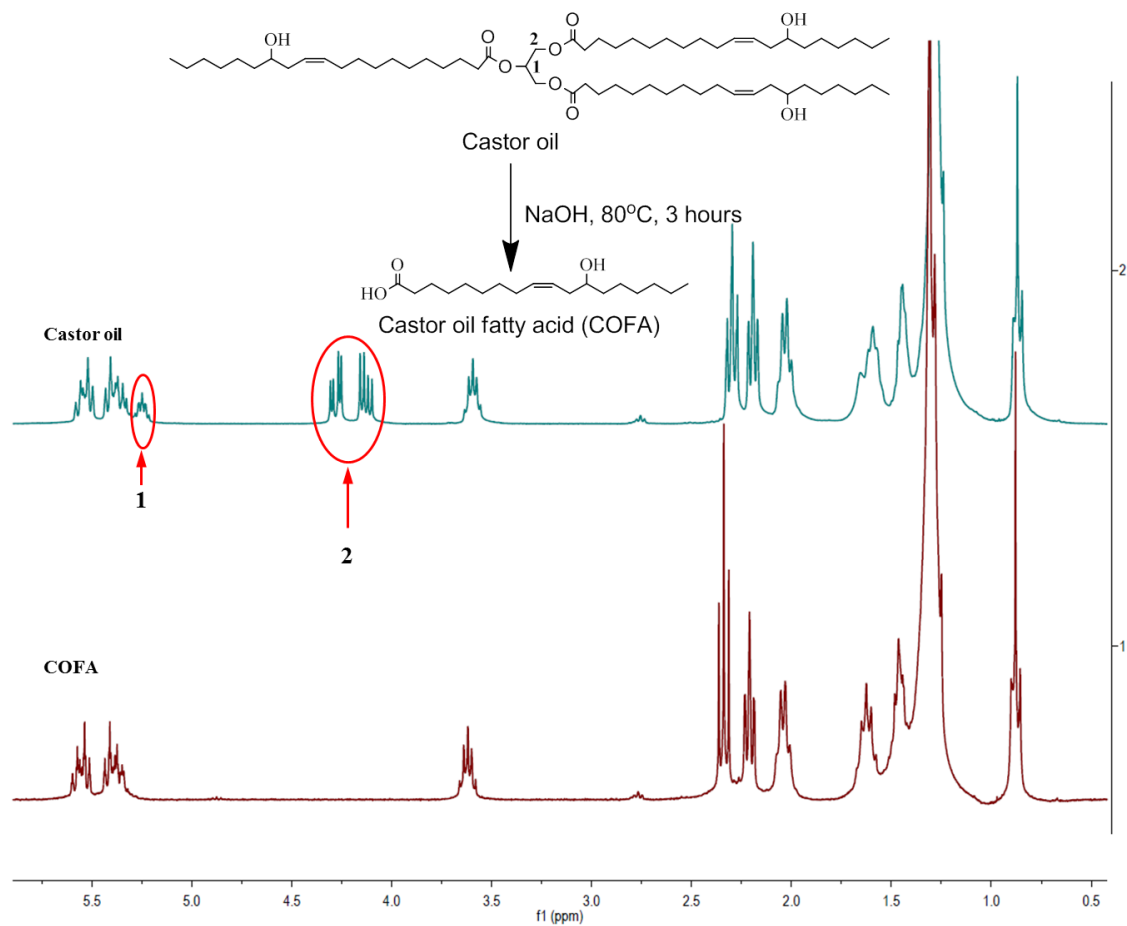

**Fig. 1** <sup>1</sup>H-NMR spectra of CO and COFA

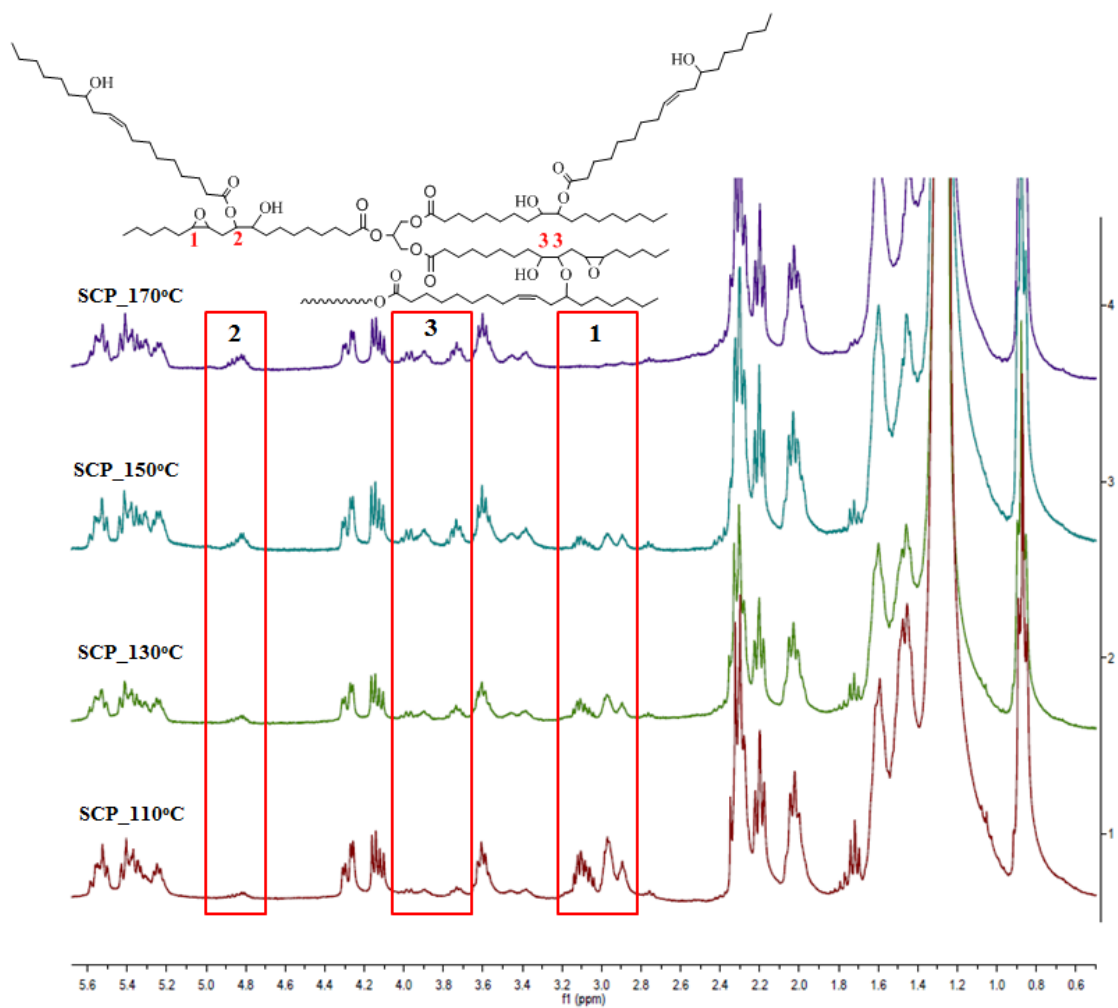

**Fig. 2** <sup>1</sup>H-NMR spectra of SCP for different reaction temperatures

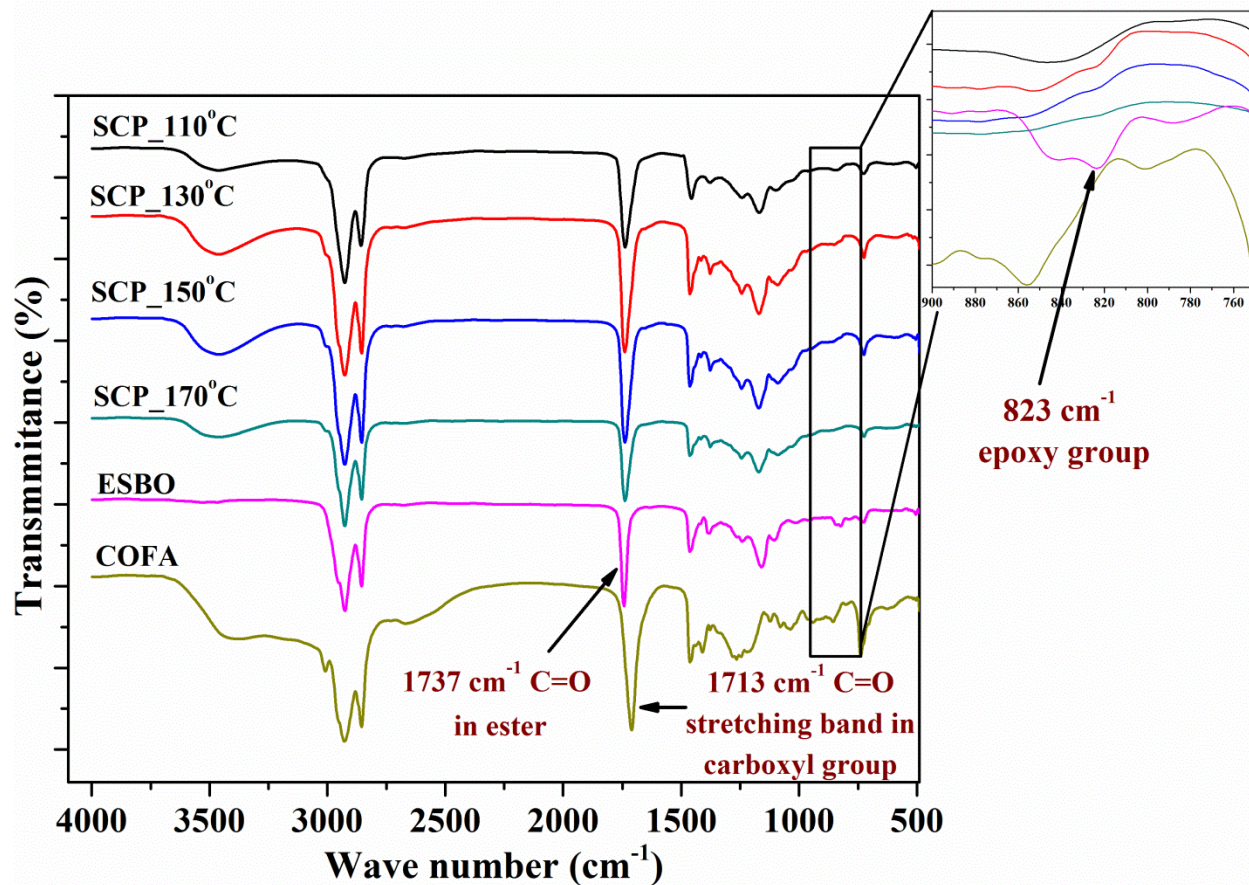

Fig. 3 FTIR spectra of SCP for different reaction temperatures

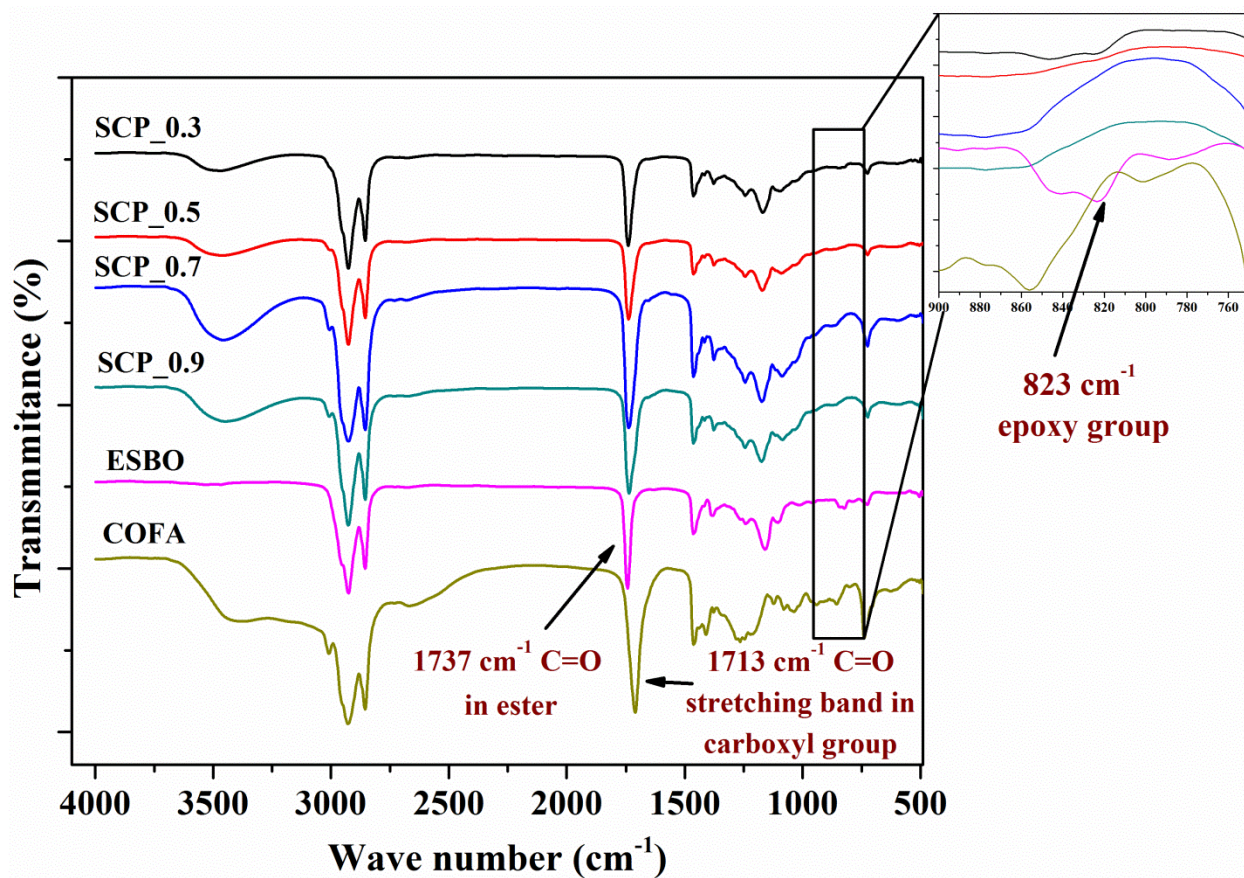

**Fig. 4** FTIR spectra of SCP for different reaction ratios of carboxyl to epoxy groups



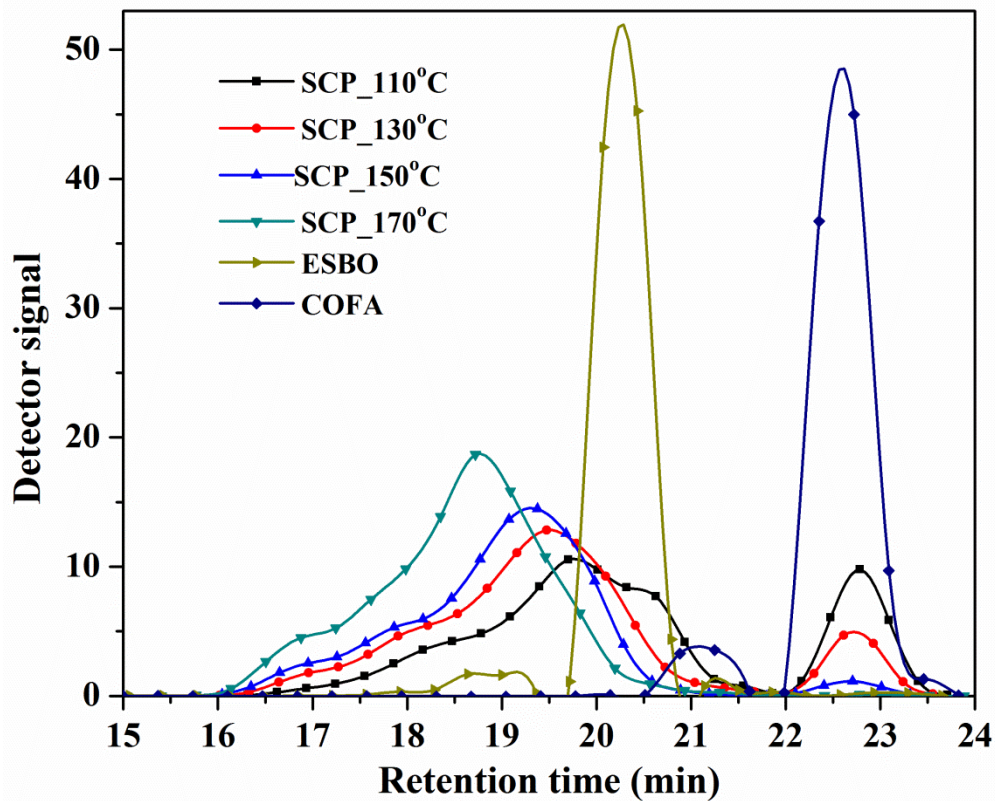

Fig. 5 GPC curves of SCP for different reaction temperatures

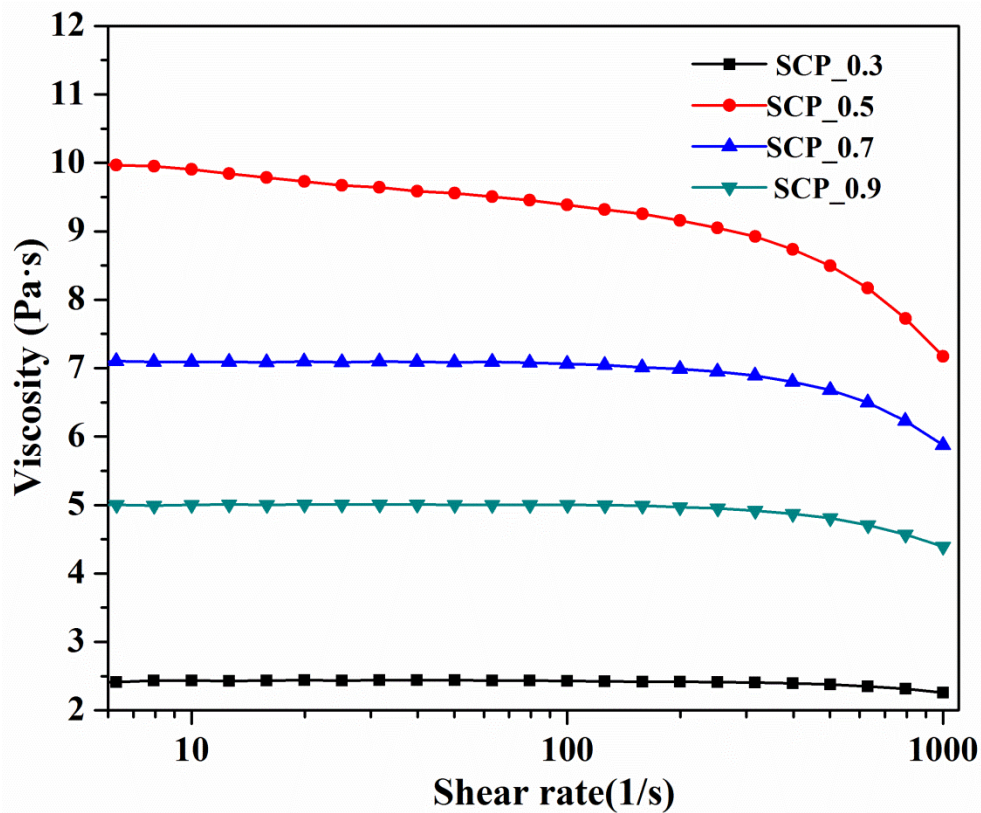

**Fig. 6** Rheological behavior of polyols prepared with different ratios of carboxyl to epoxy groups

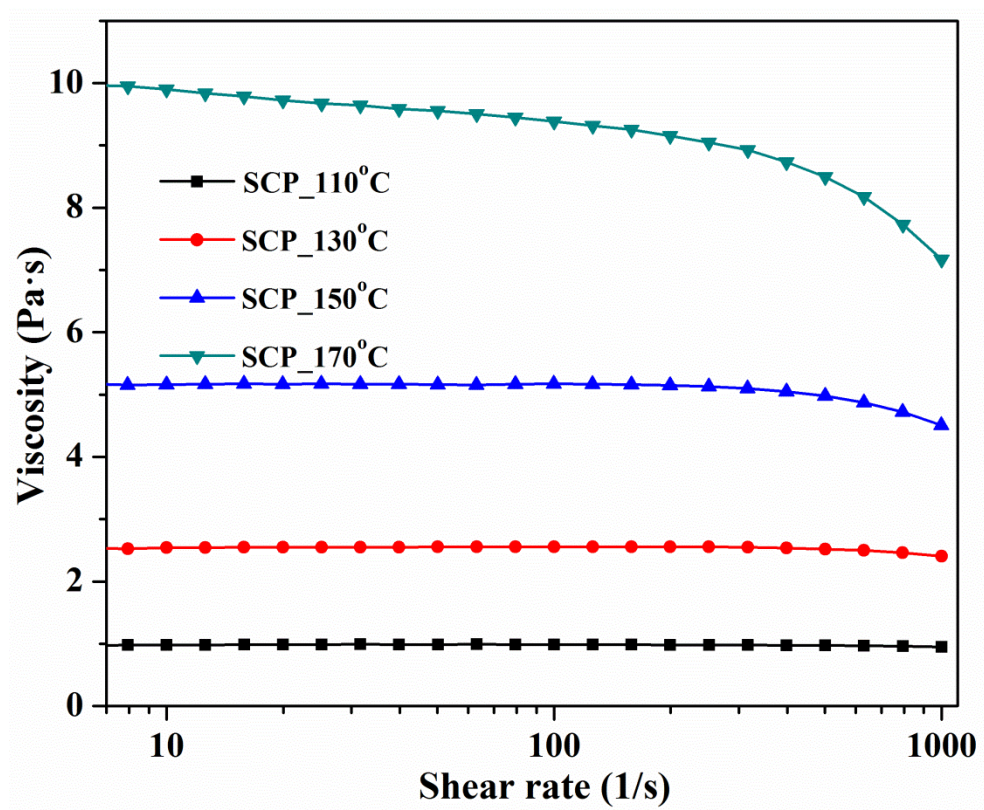

**Fig. 7** Rheological behavior of polyols prepared at different reaction temperatures
